# Supplementary material for: Large-scale analysis reveals the specific clinical and immune features of CD155 in glioma
Source: PubMed Central journal article supplement (PMC6710042; doi:10.18632/aging.102131), 2019-08-04
Supplement: aging-11-102131-s002.pdf [file aging-11-102131-s002.pdf]

## SUPPLEMENTARY TABLES

Please browse Full Text version to see the data of Supplementary Table 1:

**Supplementary Table 1. List of immune responses related genes which significantly correlated with CD155 expression in Rembrandt and TCGA datasets.**

**Supplementary Table 2. A detailed list of the 104 genes from seven metagenes.**

| Gene    | Metagene   |
|---------|------------|
| C1QB    | HCK        |
| C1QA    | HCK        |
| AIF1    | HCK        |
| LST1    | HCK        |
| DOCK2   | HCK        |
| LAPTM5  | HCK        |
| TYROBP  | HCK        |
| MS4A4A  | HCK        |
| MS4A6A  | HCK        |
| CD163   | HCK        |
| ITGB2   | HCK        |
| SLC7A7  | HCK        |
| LAIR1   | HCK        |
| HCK     | HCK        |
| TFEC    | HCK        |
| IFI30   | HCK        |
| MNDA    | HCK        |
| FCER1G  | HCK        |
| RNASE6  | HCK        |
| SLCO2B1 | HCK        |
| CCR1    | HCK        |
| IGSF8   | IgG        |
| ISLR2   | IgG        |
| IGSF21  | IgG        |
| IGSF1   | IgG        |
| IGSF22  | IgG        |
| IGDCC3  | IgG        |
| IGHD    | IgG        |
| IGSF11  | IgG        |
| IGSF5   | IgG        |
| IGSF6   | IgG        |
| IFIT1   | Interferon |
| IFIT3   | Interferon |
| IFI44L  | Interferon |
| OAS3    | Interferon |
| MX1     | Interferon |
| RSAD2   | Interferon |

|          |            |
|----------|------------|
| IFI44    | Interferon |
| OAS2     | Interferon |
| OAS1     | Interferon |
| CD2      | LCK        |
| GZMK     | LCK        |
| GZMA     | LCK        |
| CD3D     | LCK        |
| CD53     | LCK        |
| LCK      | LCK        |
| ARHGAP15 | LCK        |
| CCL5     | LCK        |
| GMFG     | LCK        |
| SELL     | LCK        |
| STAT4    | LCK        |
| SAMSN1   | LCK        |
| RAC2     | LCK        |
| HCLS1    | LCK        |
| CCR7     | LCK        |
| PIK3CD   | LCK        |
| CORO1A   | LCK        |
| CD48     | LCK        |
| IL2RG    | LCK        |
| SH2D1A   | LCK        |
| SLAMF1   | LCK        |
| IL7R     | LCK        |
| INPP5D   | LCK        |
| KLRK1    | LCK        |
| FGL2     | LCK        |
| IRF8     | LCK        |
| SELPLG   | LCK        |
| IL10RA   | LCK        |
| SLA      | LCK        |
| CCR2     | LCK        |
| CSF2RB   | LCK        |
| HLA-E    | MHC_I      |
| HLA-H    | MHC_I      |
| HLA-B    | MHC_I      |
| HLA-J    | MHC_I      |
| HLA-F    | MHC_I      |
| HLA-G    | MHC_I      |
| HLA-A    | MHC_I      |
| HLA-C    | MHC_I      |
| HLA-L    | MHC_I      |
| HLA-DRB1 | MHC_II     |
| HLA-DRB5 | MHC_II     |
| HLA-DRB3 | MHC_II     |
| HLA-DPA1 | MHC_II     |
| HLA-DRA  | MHC_II     |

|          |        |
|----------|--------|
| HLA-DQA1 | MHC_II |
| HLA-DQA2 | MHC_II |
| HLA-DMA  | MHC_II |
| HLA-DOA  | MHC_II |
| HLA-DRB4 | MHC_II |
| HLA-DMB  | MHC_II |
| HLA-DQB1 | MHC_II |
| HLA-DPB1 | MHC_II |
| HLA-DQB2 | MHC_II |
| CD74     | MHC_II |
| PTPRC    | MHC_II |
| HLA-DOB  | MHC_II |
| HLA-DPB2 | MHC_II |
| TAP1     | STAT1  |
| STAT1    | STAT1  |
| CXCL10   | STAT1  |
| CXCL11   | STAT1  |
| GBP1     | STAT1  |
| CXCL9    | STAT1  |

**Supplementary Table 3. A detailed list of specific biomarkers of eight immune cell types.**

| inflammatory cell type | biomarker |
|------------------------|-----------|
| Macrophages            | CD14      |
| Macrophages            | HLADRA    |
| Macrophages            | CD312     |
| Macrophages            | CD115     |
| Macrophages            | CD163     |
| Macrophages            | CD204     |
| Macrophages            | CD301     |
| Macrophages            | CD206     |
| Neutrophils            | CD11b     |
| Neutrophils            | CD16      |
| Neutrophils            | CD66b     |
| Neutrophils            | ELANE     |
| MDSCs                  | CD14      |
| MDSCs                  | CD16      |
| MDSCs                  | CD33      |
| MDSCs                  | ARG1      |
| CD8T                   | CD3E      |
| CD8T                   | CD8A      |
| NK                     | CD16      |
| NK                     | CD56      |
| Tregs                  | CD3E      |
| Tregs                  | CD4       |
| Tregs                  | CD25      |
| Tregs                  | FOXP3     |
| CD4T                   | CD3E      |

CD4T  
DC  
DC

CD4  
CD11b  
CD11c

**Supplementary Table 4. Detailed information of correlations between CD155 and other immune markers in Rembrandt and TCGA datasets.**

Correlations between CD155 and other immune markers in Rembrandt dataset

| markers | Glioma |            | GBM   |            |
|---------|--------|------------|-------|------------|
|         | r      | p          | r     | p          |
| PD-L1   | 0.190  | 0.000030   | 0.206 | 0.001854   |
| GITR    | 0.484  | 2.7549E-29 | 0.427 | 1.8349E-11 |
| NR2F6   | 0.355  | 1.3494E-15 | 0.340 | 1.5539E-7  |
| B7-H2   | 0.363  | 3.0646E-16 | 0.363 | 1.7472E-8  |
| CD96    | 0.255  | 1.6272E-8  | 0.198 | 0.002667   |
| CD226   | 0.206  | 0.000006   | 0.183 | 0.005814   |
| Nectin4 | 0.353  | 2.188E-15  | 0.338 | 1.8366E-7  |
| TIGIT   | 0.073  | 0.113151   | 0.055 | 0.408430   |
| CD112   | 0.089  | 0.052727   | 0.125 | 0.059775   |

Correlations between CD155 and other immune markers in TCGA dataset

| markers | Glioma |            | GBM    |            |
|---------|--------|------------|--------|------------|
|         | r      | p          | r      | p          |
| PD-L1   | 0.367  | 8.9678E-24 | 0.343  | 0.000005   |
| GITR    | 0.428  | 1.8544E-32 | 0.505  | 3.0394E-12 |
| NR2F6   | 0.360  | 8.0572E-23 | 0.504  | 3.2147E-12 |
| B7-H2   | 0.194  | 2.3076E-7  | 0.127  | 0.101887   |
| CD96    | 0.173  | 0.000004   | 0.048  | 0.533583   |
| CD226   | 0.146  | 0.000103   | 0.054  | 0.483812   |
| Nectin4 | 0.258  | 4.4827E-12 | 0.313  | 0.000037   |
| TIGIT   | -0.074 | 0.051879   | -0.062 | 0.427740   |
| CD112   | 0.590  | 1.1734E-66 | 0.627  | 9.3073E-20 |
