# Supplementary material for: Large-scale analysis reveals the specific clinical and immune features of CD155 in glioma
Source: PubMed Central journal article supplement (PMC6710042; doi:10.18632/aging.102131), 2019-08-04
Supplement: aging-11-102131-s003.pdf [file aging-11-102131-s003.pdf]

## SUPPLEMENTARY FIGURES

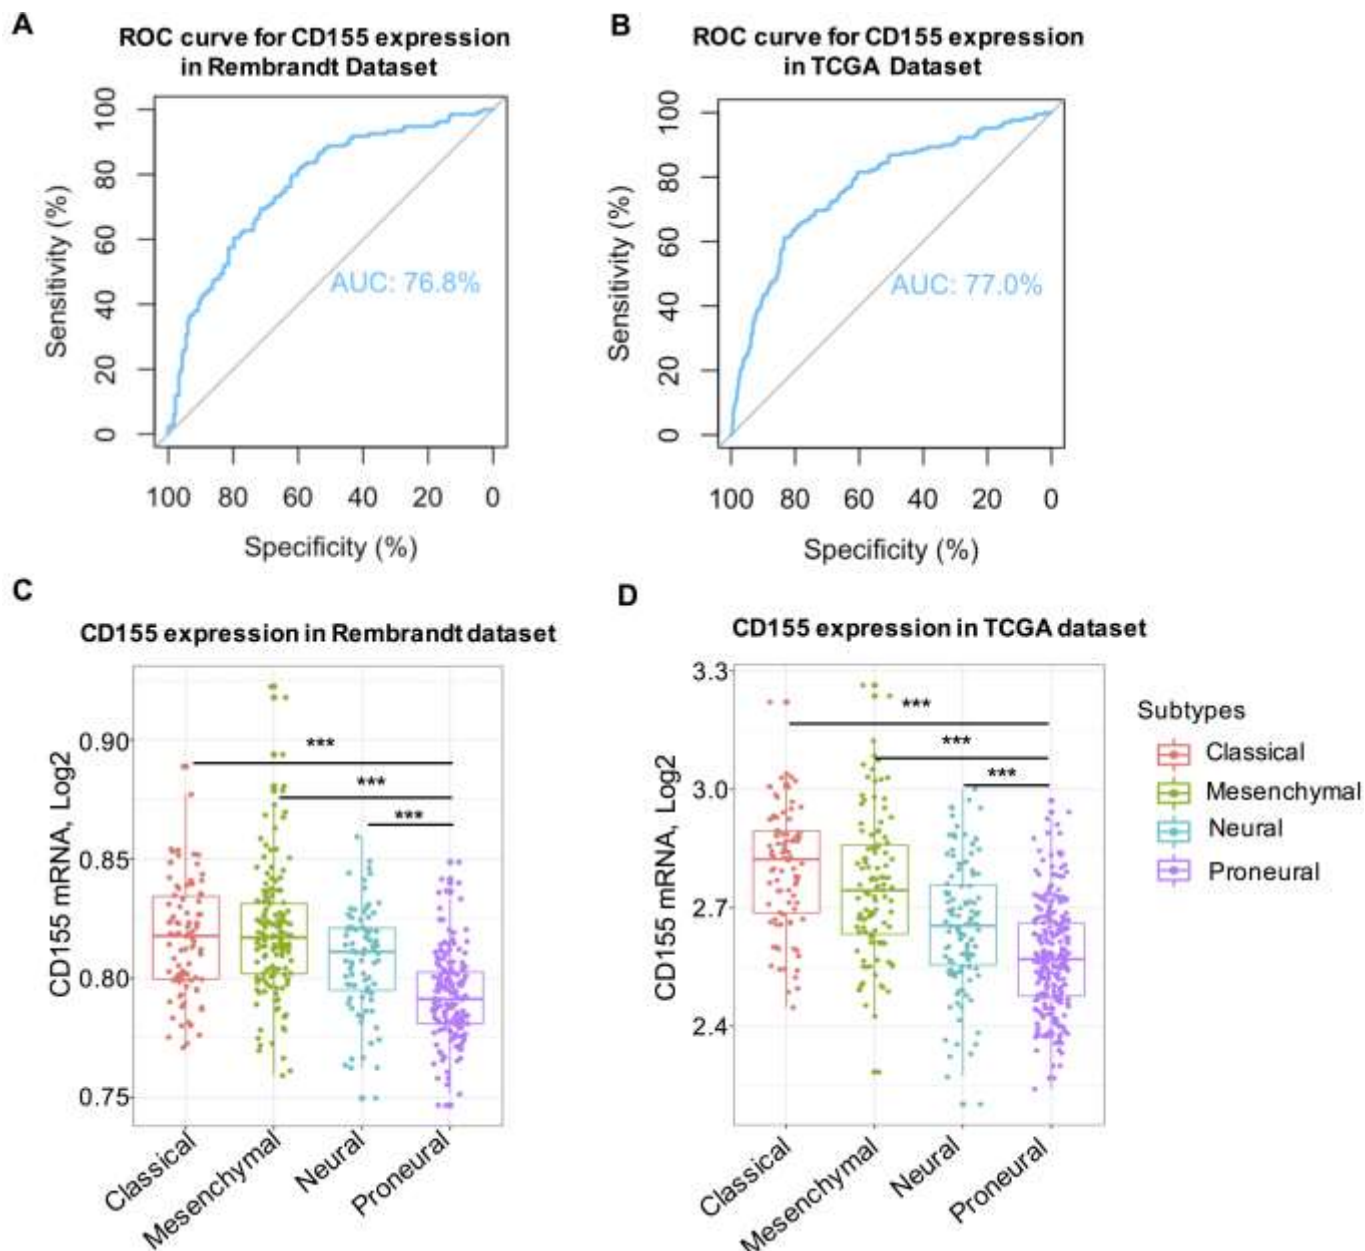

**Supplementary Figure 1. Relationship between CD155 expression and glioma molecular subtypes.** ROC curve analysis revealed the predictive value of CD155 expression in GBM based on both datasets (A and B). CD155 expression pattern in different molecular subtypes of gliomas based on Rembrandt (C) and TCGA (D) datasets.

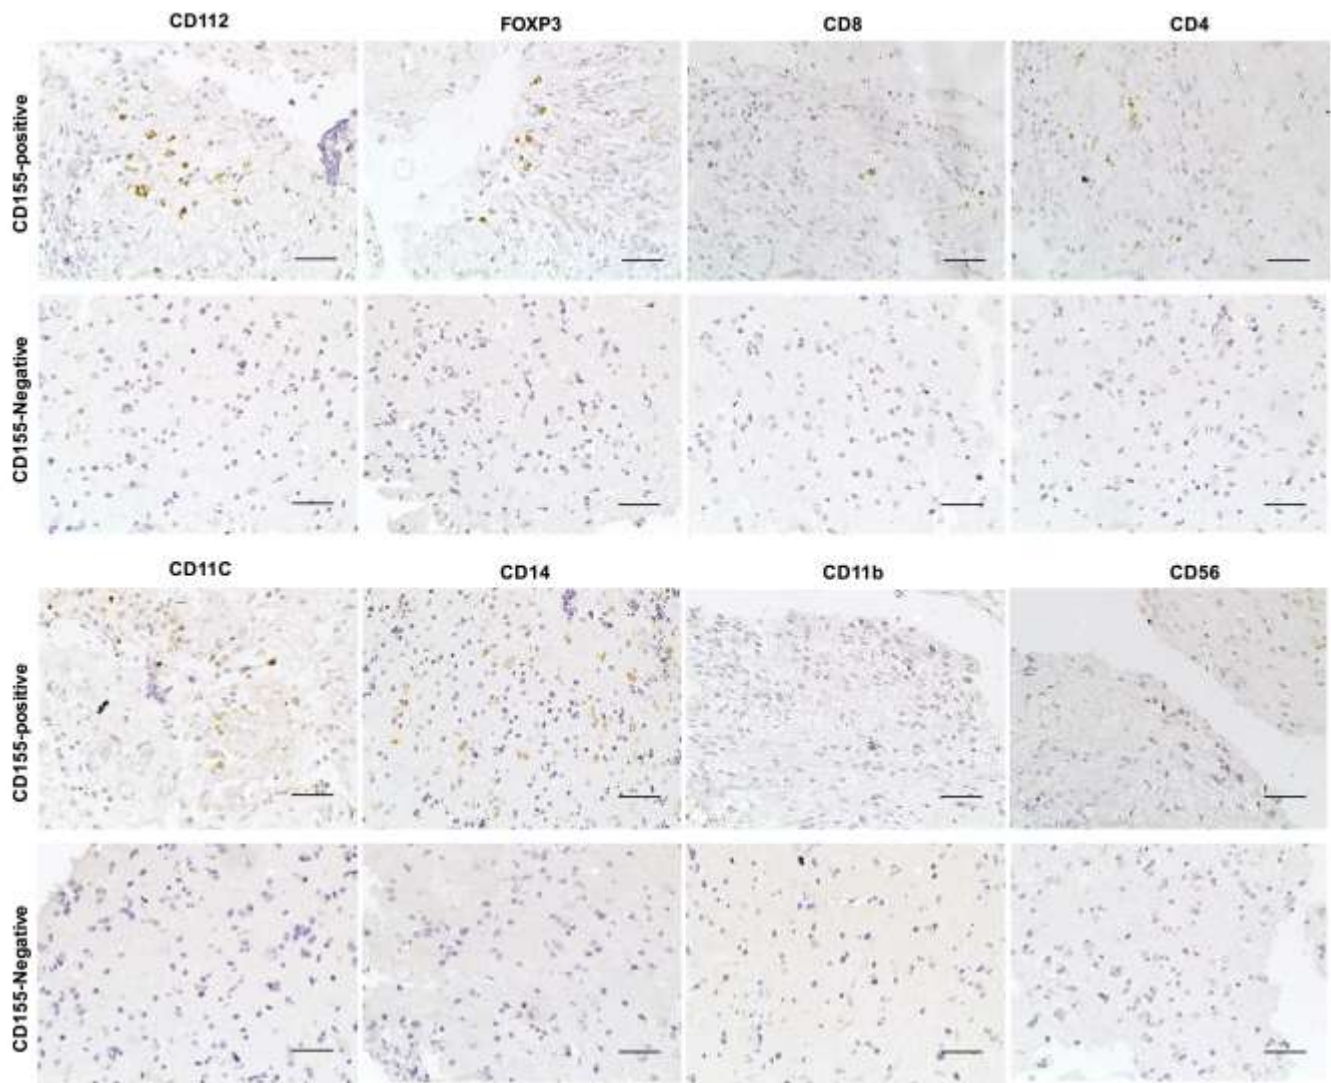

**Supplementary Figure 2. Expression of CD112, CD11b, CD14, CD56, CD11c, FOXP3, CD8 and CD4 in CD155-positive and CD155-negative glioma samples. Scale bars, 100 mm.**

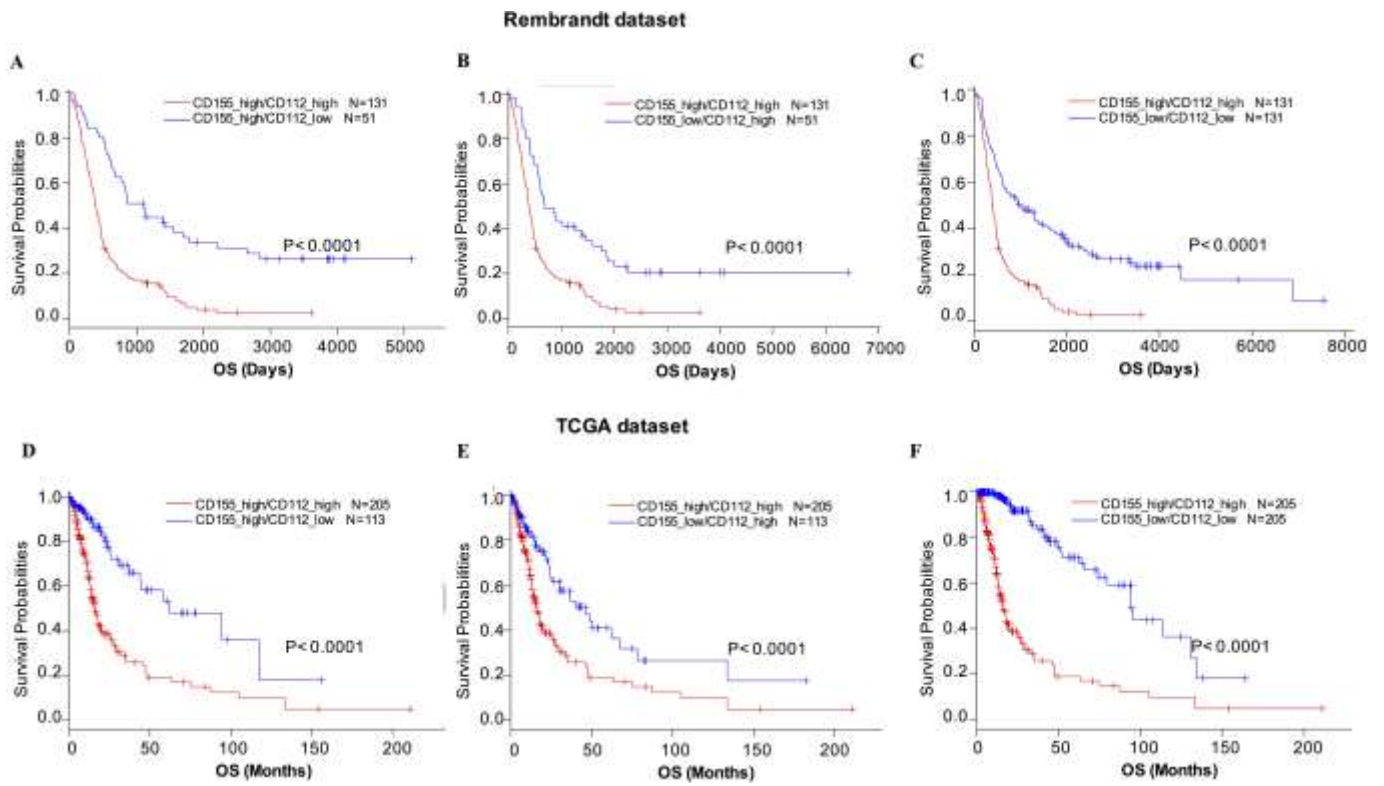

**Supplementary Figure 3.** Survival analysis based on high/low CD155 expression and high/low D112 expression in Rembrandt (A) and TCGA (B) datasets.
